# Supplementary material for: Intraoperative Oliguria with Decreased SvO2 Predicts Acute Kidney Injury after Living Donor Liver Transplantation
Source: PubMed Central journal article supplement (PMC6351957; doi:10.3390/jcm8010029), 2018-12-28

## **Supplemental Materials**

### **Intraoperative oliguria with decreased SvO<sub>2</sub> predicts acute kidney injury after living donor liver transplantation**

**Supplemental Table S1.** Multivariable logistic regression analysis to predict acute kidney injury after liver transplantation without stepwise variable selection.

**Supplemental Table S2.** Odds ratios (95% confidence intervals) and their P-values according to the categorized intraoperative urine flow rate with different cut-offs determined by both the univariable and multivariable logistic regression analysis for acute kidney injury of any stage in all patients.

**Supplemental Table S3.** Subgroup analysis for the patients who had not received diuretics either before or during surgery (n=435). Odds ratios (95% confidence intervals) and their p-values according to the categorized intraoperative urine flow rate with different cut-offs determined by both the univariable and multivariable logistic regression analysis for acute kidney injury were shown.

**Supplemental Table S4.** Comparisons of independent predictors of the multivariable logistic regression analysis of our study between male and female.

**Supplemental Figure S1.** Distribution of mean urine flow rate during liver transplantation surgery in all patients (upper), and box and whisker plots of urine flow rate during liver transplantation surgery with and without postoperative acute kidney injury (lower).

**Supplemental Table S1.** Multivariable logistic regression analysis to predict acute kidney injury after liver transplantation without stepwise variable selection.

| Variable                                                | Odds Ratio | 95% CI       | p-value |
|---------------------------------------------------------|------------|--------------|---------|
| Age, year                                               | 1.01       | 0.98 – 1.05  | 0.441   |
| Female                                                  | 1.29       | 0.62 – 2.68  | 0.505   |
| Body-mass index, kg/m <sup>2</sup>                      | 1.04       | 0.98 – 1.18  | 0.069   |
| Year of operation, per 1 year increase                  | 0.96       | 0.81 – 1.23  | 0.365   |
| MELD score                                              | 1.08       | 0.93 – 1.24  | 0.478   |
| CTP score                                               | 1.11       | 0.92 – 1.35  | 0.281   |
| Hypertension                                            | 0.82       | 0.50 – 1.37  | 0.183   |
| Diabetes Mellitus                                       | 1.47       | 0.59 – 3.66  | 0.216   |
| Preoperative hemoglobin, g/dL                           | 0.94       | 0.83 – 1.05  | 0.057   |
| Preoperative albumin, g/dL                              | 0.92       | 0.60 – 1.41  | 0.706   |
| Preoperative serum creatinine, mg/dL                    | 1.23       | 0.72 – 2.27  | 0.260   |
| ABO type incompatibility                                | 2.35       | 0.58 – 9.60  | 0.233   |
| Operation time, hour                                    | 1.14       | 0.88 – 1.46  | 0.065   |
| Cold ischemic time, min                                 | 1.03       | 1.00 – 1.09  | 0.052   |
| Warm ischemic time, min                                 | 1.01       | 0.98 – 1.03  | 0.716   |
| Intraoperative diuretics use                            | 0.95       | 0.50 – 1.84  | 0.886   |
| Intraoperative blood loss, per 100 ml/kg                | 1.24       | 0.10 – 15.77 | 0.870   |
| Crystalloid administration, per 10 ml/kg                | 1.05       | 0.96 – 1.21  | 0.089   |
| Colloid administration, per 10 ml/kg                    | 1.39       | 0.99 – 1.04  | 0.207   |
| Red blood cell transfusion, unit                        | 1.16       | 0.95 – 1.36  | 0.962   |
| Fresh Frozen plasma, unit                               | 1.04       | 0.93 – 1.16  | 0.534   |
| Intraoperative furosemide use                           | 1.10       | 0.59 – 2.06  | 0.759   |
| SvO <sub>2</sub> reduction with oliguria < 0.5 ml/kg/hr | 3.22       | 1.44 – 6.98  | 0.001   |

CI = confidence interval; MELD score = Model for End-stage Liver Disease score; CTP score = Child-Turcotte-Pugh score; SvO<sub>2</sub> = Mixed venous oxygen saturation.

**Supplemental Table S2.** Odds ratios (95% confidence intervals) and their P-values according to the categorized intraoperative urine flow rate with different cut-offs determined by both the univariable and multivariable logistic regression analysis for acute kidney injury of any stage in all patients.

| Cut-off (mL/kg/h) | Unadjusted OR (95% CI) | <i>P</i> -value | Adjusted OR (95% CI) | <i>P</i> -value |
|-------------------|------------------------|-----------------|----------------------|-----------------|
| <3.0              | 1.33 (0.71 – 2.50)     | 0.369           | 1.69 (0.65 – 4.35)   | 0.280           |
| <2.5              | 1.33 (0.81 – 2.17)     | 0.265           | 1.48 (0.72 – 3.02)   | 0.288           |
| <2.0              | 1.66 (1.09 – 2.53)     | 0.019           | 1.89 (0.82 – 3.51)   | 0.155           |
| <1.5              | 1.59 (1.12 – 2.26)     | 0.009           | 1.61 (0.95 – 2.71)   | 0.075           |
| <1.0              | 1.51 (1.07 – 2.13)     | 0.018           | 1.64 (1.00 – 2.74)   | 0.049           |
| <0.5              | 2.69 (1.88 – 3.85)     | <0.001          | 3.41 (1.93 – 6.02)   | <0.001          |
| <0.3              | 2.43 (1.61 – 3.16)     | <0.001          | 2.33 (1.08 – 5.08)   | 0.002           |

OR = odds ratio, CI = confidence interval. In multivariable logistic regression analysis, all covariates in Table 1 were considered.

**Supplemental Table S3.** Subgroup analysis for the patients who had not received diuretics either before or during surgery (n=435). Odds ratios (95% confidence intervals) and their p-values according to the categorized intraoperative urine flow rate with different cut-offs determined by both the univariable and multivariable logistic regression analysis for acute kidney injury were shown.

| Cut-offs (mL/kg/h) | Unadjusted OR (95% CI) | P-value | Adjusted OR (95% CI) | P-value |
|--------------------|------------------------|---------|----------------------|---------|
| <3.0               | 1.12 (0.54 – 2.35)     | 0.757   | 1.92 (0.52 – 7.04)   | 0.326   |
| <2.5               | 1.37 (0.74 – 2.53)     | 0.313   | 2.31 (0.85 – 6.27)   | 0.100   |
| <2.0               | 1.71 (1.03 – 2.86)     | 0.039   | 2.66 (0.82 – 6.31)   | 0.126   |
| <1.5               | 1.40 (0.93 – 2.10)     | 0.109   | 1.45 (0.76 – 2.77)   | 0.266   |
| <1.0               | 1.11 (0.75 – 1.66)     | 0.597   | 1.18 (0.63 – 2.21)   | 0.612   |
| <0.5               | 2.00 (1.31 – 3.05)     | 0.001   | 2.10 (1.05 – 4.20)   | 0.035   |
| <0.3               | 2.34 (1.22 – 4.48)     | 0.010   | 2.54 (0.79 – 8.17)   | 0.119   |

OR = odds ratio, CI = confidence interval. In multivariable logistic regression analysis, all covariates in Table 1 were considered.

**Supplemental Table S4.** Comparisons of independent predictors of the multivariable logistic regression analysis of our study between male and female.

| Variable                                 | Male (n = 435)     | Female (n = 148)   | <i>P</i> -value |
|------------------------------------------|--------------------|--------------------|-----------------|
| Body-mass index, kg/m <sup>2</sup>       | 23.2 (21.5 – 25.2) | 22.6 (20.8 – 25.4) | 0.165           |
| preoperative hemoglobin, g/dL            | 11.4 (9.5 – 13.2)  | 10.1 (9.0 – 11.5)  | <0.001          |
| preoperative albumin, g/dL               | 2.9 (2.5 – 3.6)    | 2.9 (2.5 – 3.3)    | 0.206           |
| Operation time, hour                     | 7.3 (6.2 – 8.3)    | 7.1 (6.1 – 8.2)    | 0.375           |
| Cold ischemic time, min                  | 72.1 (60.0 – 86.0) | 72.2 (61.0 – 87.2) | 0.807           |
| RBC transfusion, unit                    | 4 (1 – 10)         | 5 (2 – 11)         | 0.615           |
| Crystalloid administration, per 10 ml/kg | 5.3 (3.7 – 7.3)    | 5.9 (4.2 – 8.0)    | 0.024           |

RBC = red blood cell. *P*-values are the results of Mann-Whitney U test.

**Supplemental Figure S1.** Distribution of mean urine flow rate during liver transplantation surgery in all patients (upper), and box and whisker plots of urine flow rate during liver transplantation surgery with and without postoperative acute kidney injury (lower).

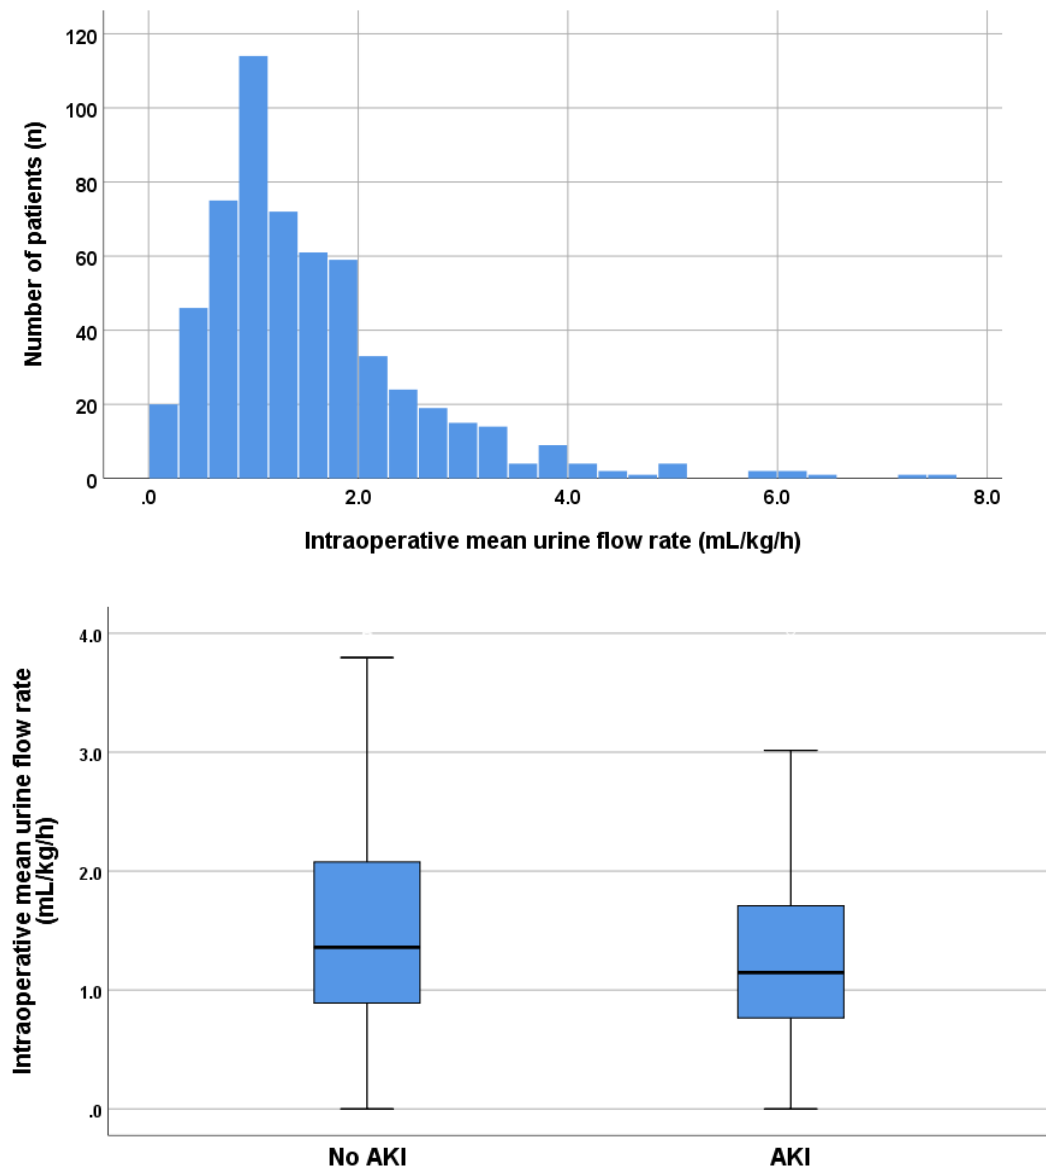

Supplement: jcm-08-00029-s001.pdf [file jcm-08-00029-s001.pdf]
